# Supplementary material
Source: PubMed Central journal article supplement (PMC7576683)
Supplement: ofaa319_suppl_supplementary_material.pdf [file ofaa319_suppl_supplementary_material.pdf]

# Remdesivir Use Compared to Supportive Care in Hospitalized Patients with Severe COVID-

19:

## A Single-Center Experience

Markos Kalligeros<sup>1</sup>, Karen T. Tashima<sup>1,\*</sup>, Evangelia K. Mylona<sup>1</sup>, Natasha Rybak<sup>1</sup>, Timothy P. Flanigan<sup>1</sup>, Dimitrios Farmakiotis<sup>1</sup>, Curt G. Beckwith<sup>1</sup>, Martha Sanchez<sup>1</sup>, Marguerite Neill<sup>1</sup>, Jennie E. Johnson<sup>1</sup>, Joseph M. Garland<sup>1</sup>, Su Aung<sup>1</sup>, Katrina M. Byrd<sup>1</sup>, Thomas O'Brien<sup>1</sup>, Aakriti Pandita<sup>1</sup>, Jad Aridi<sup>1</sup>, Raul Macias Gil<sup>1</sup>, Jerome Larkin<sup>1</sup>, Fadi Shehadeh<sup>1</sup>, Eleftherios Mylonakis<sup>1,\*</sup>

## Supplementary Appendix

**Affiliation:** Infectious Diseases Division, Warren Alpert Medical School of Brown University, Providence, RI, USA,

**Correspondence to:** \*Karen T. Tashima, 180 Corliss St. Suite F, The Miriam Hospital, Providence, RI 02904

[KTashima@Lifespan.org](mailto:KTashima@Lifespan.org)

\*Eleftherios Mylonakis, 593 Eddy Street, 328/330 POB Providence, Rhode Island 02903, USA. [emylonakis@lifespan.org](mailto:emylonakis@lifespan.org)

**Summary:** Patients on remdesivir had lower in hospital mortality, albeit not significant, and the use of remdesivir did not increase the risk for AKI.

Supplementary Figure 1 - Kaplan Meier survival estimates of 28-days in-hospital death

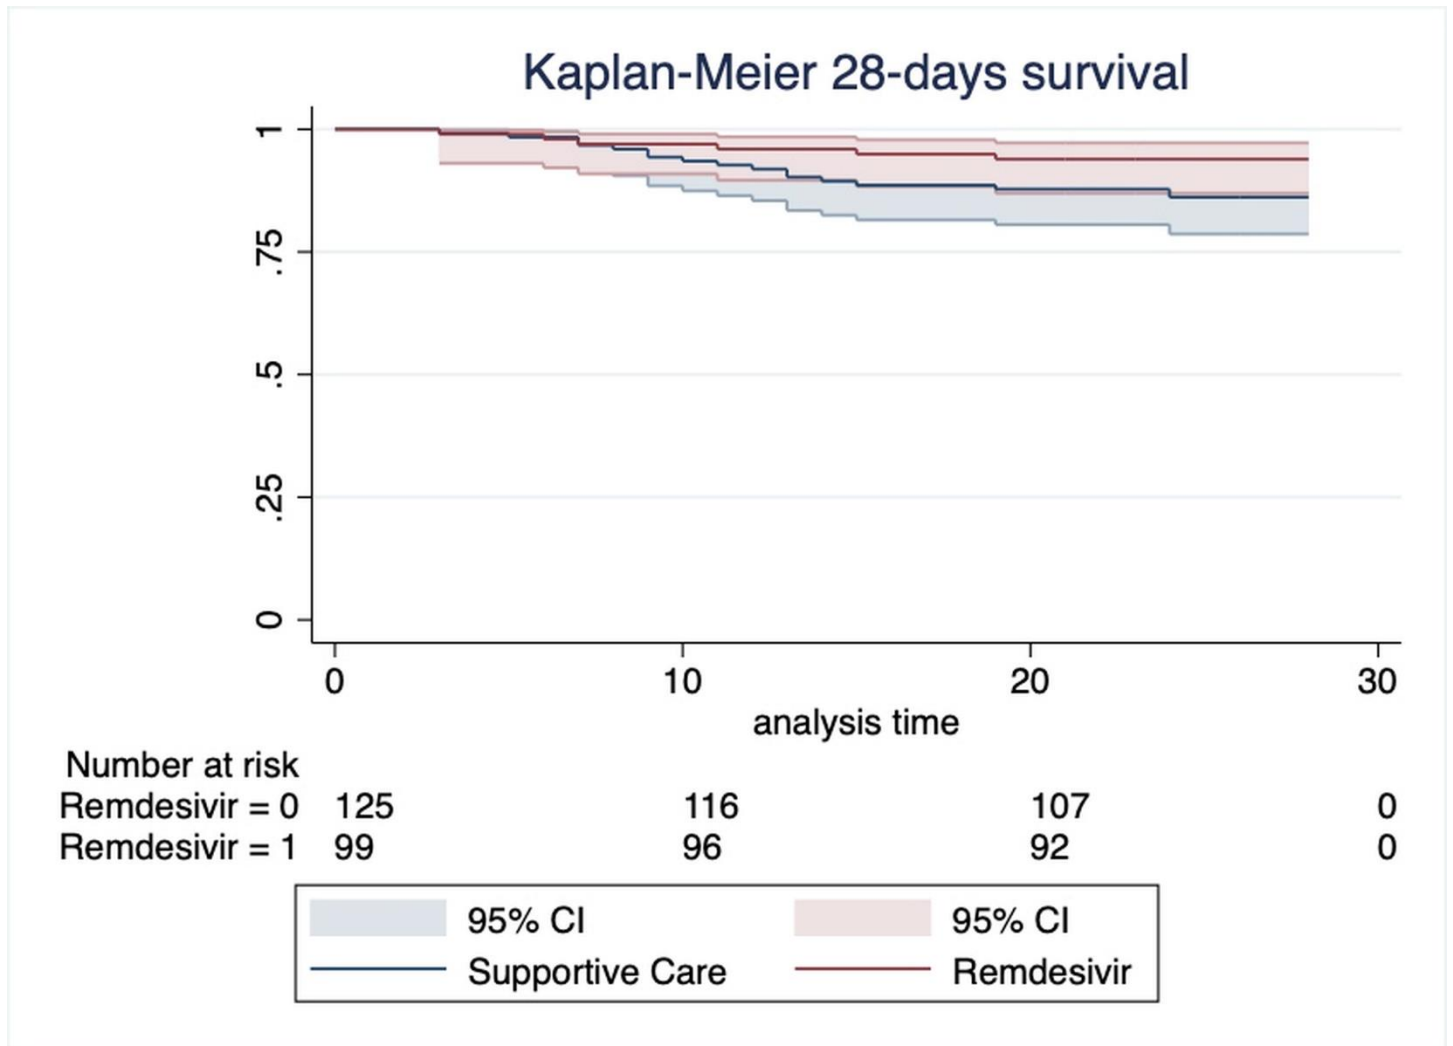

Supplementary Table 1. Characteristics of patients enrolled in the RDV trial arm

|                                                         | Total               | Included            | Excluded            | p-value |
|---------------------------------------------------------|---------------------|---------------------|---------------------|---------|
|                                                         | N=145               | N=99                | N=46                |         |
| <b>Age</b>                                              | 60.00 (52.00-70.00) | 58.00 (50.00-68.00) | 62.00 (58.00-76.00) | 0.021   |
| <b>Gender</b>                                           |                     |                     |                     | 0.78    |
| Female                                                  | 45 (31.0%)          | 30 (30.3%)          | 15 (32.6%)          |         |
| Male                                                    | 100 (69.0%)         | 69 (69.7%)          | 31 (67.4%)          |         |
| <b>Race</b>                                             |                     |                     |                     | 0.72    |
| Asian                                                   | 1 (0.7%)            | 1 (1.0%)            | 0 (0.0%)            |         |
| Black or African American                               | 17 (11.7%)          | 10 (10.1%)          | 7 (15.2%)           |         |
| Hispanic or Latino                                      | 68 (46.9%)          | 48 (48.5%)          | 20 (43.5%)          |         |
| Other/Unknown                                           | 9 (6.2%)            | 5 (5.1%)            | 4 (8.7%)            |         |
| White or Caucasian                                      | 50 (34.5%)          | 35 (35.4%)          | 15 (32.6%)          |         |
| <b>Hypertension</b>                                     | 55 (37.9%)          | 32 (32.3%)          | 23 (50.0%)          | 0.041   |
| <b>HeartDisease</b>                                     | 23 (15.9%)          | 14 (14.1%)          | 9 (19.6%)           | 0.41    |
| <b>Chronic pulmonary disease</b>                        | 15 (10.3%)          | 11 (11.1%)          | 4 (8.7%)            | 0.66    |
| <b>Diabetes</b>                                         | 43 (29.7%)          | 28 (28.3%)          | 15 (32.6%)          | 0.60    |
| <b>Renal failure</b>                                    | 4 (2.8%)            | 3 (3.0%)            | 1 (2.2%)            | 0.77    |
| <b>Liver disease</b>                                    | 5 (3.4%)            | 4 (4.0%)            | 1 (2.2%)            | 0.57    |
| <b>Obesity</b>                                          | 58 (40.0%)          | 43 (43.4%)          | 15 (32.6%)          | 0.22    |
| <b>Days between Symptom Onset and Admission</b>         | 6.00 (3.00-8.00)    | 6.00 (3.00-8.00)    | 4.00 (2.00-7.00)    | 0.14    |
| <b>Days between Symptom Onset and initiation of RDV</b> | 8.00 (5.00-10.00)   | 7.00 (5.00-10.00)   | 9.00 (6.00-12.00)   | 0.008   |
| <b>Baseline Oxygen</b>                                  |                     |                     |                     | 0.76    |
| Invasive Mechanical Ventilation                         | 26 (17.9%)          | 19 (19.2%)          | 7 (15.2%)           |         |
| Low Flow Supplemental Oxygen                            | 72 (49.7%)          | 48 (48.5%)          | 24 (52.2%)          |         |
| NIPPV or HFNC                                           | 38 (26.2%)          | 27 (27.3%)          | 11 (23.9%)          |         |
| Room Air                                                | 9 (6.2%)            | 5 (5.1%)            | 4 (8.7%)            |         |
| <b>Hydroxychloroquine</b>                               | 11 (7.6%)           | 5 (5.1%)            | 6 (13.0%)           | 0.091   |
| <b>Convalescent plasma</b>                              | 9 (6.2%)            | 3 (3.0%)            | 6 (13.0%)           | 0.020   |
| <b>Weighted Elixhauser index (van Walraven)</b>         |                     |                     |                     | 0.006   |
| <0                                                      | 36 (24.8%)          | 29 (29.3%)          | 7 (15.2%)           |         |
| 0                                                       | 42 (29.0%)          | 34 (34.3%)          | 8 (17.4%)           |         |
| 1-4                                                     | 18 (12.4%)          | 9 (9.1%)            | 9 (19.6%)           |         |
| >=5                                                     | 49 (33.8%)          | 27 (27.3%)          | 22 (47.8%)          |         |
| <b>ICU admission</b>                                    | 81 (55.9%)          | 51 (51.5%)          | 30 (65.2%)          | 0.12    |
| <b>Intubation</b>                                       | 45 (31.0%)          | 28 (28.3%)          | 17 (37.0%)          | 0.29    |

Comorbidities were estimated using ICD-10 codes according to the Elixhauser Comorbidity Index

\*At least 1 dose of dexamethasone, fludrocortisone, hydrocortisone, methylprednisolone, or prednisone
